# Supplementary material for: Solid Fuel Use for Household Cooking: Country and Regional Estimates for 1980–2010
Source: PubMed Central journal article supplement (PMC3701999; doi:10.1289/ehp.1205987), 2013-05-03
Supplement: ehp.1205987.s001.pdf [file ehp.1205987.s001.pdf]

**Supplemental Material**  
**Solid Fuel Use for Household Cooking: Country and Regional Estimates**  
**for 1980-2010**

Sophie Bonjour, Heather Adair-Rohani, Jennyfer Wolf, Nigel G. Bruce, Sumi Mehta, Annette Prüss-Üstün, Maureen Lahiff, Eva A. Rehfuss, Vinod Mishra, Kirk R. Smith

**Contents**

|                                                                                                                                           |    |
|-------------------------------------------------------------------------------------------------------------------------------------------|----|
| Supplemental Material, Table S1. Surveys available in the WHO Household Energy database by region.....                                    | 2  |
| Modeling approaches investigated.....                                                                                                     | 2  |
| Supplemental Material, Table S2. Percentage of population using solid fuels as main cooking fuel in 1990, 2000 and 2010, by country. .... | 4  |
| Supplemental Material, Table S3. Percentage of population using solid fuels as main cooking fuel in 1990, 2000 and 2010, by region. ....  | 9  |
| Supplemental Material, Table S4. Population using solid fuels as main cooking fuel in 1990, 2000 and 2010, by region. ....                | 9  |
| References .....                                                                                                                          | 10 |

**Supplemental Material, Table S1. Surveys available in the WHO Household Energy database by region.**

| Regions <sup>a</sup>                   | No. of countries (% region)/ territories | Population coverage | No. of surveys | % of surveys |
|----------------------------------------|------------------------------------------|---------------------|----------------|--------------|
| <i>Low and middle income countries</i> |                                          |                     |                |              |
| Africa <sup>b</sup>                    | 45 (98%)                                 | 100%                | 212            | 36           |
| Americas                               | 28 (97%)                                 | 100%                | 135            | 23           |
| Eastern Mediterranean                  | 15 (100%)                                | 100%                | 38             | 6            |
| Europe                                 | 20 (91%)                                 | 97%                 | 48             | 8            |
| Southeast Asia                         | 11 (100%)                                | 100%                | 54             | 9            |
| Western Pacific                        | 20 (95%)                                 | 100%                | 65             | 11           |
| <i>High income countries</i>           | 13 (27%)                                 | 40%                 | 25             | 4            |
| Territories <sup>c</sup>               | 3                                        | -                   | 9              | 2            |
| <b>Total</b>                           | <b>155</b>                               | <b>90%</b>          | <b>586</b>     | <b>100%</b>  |

Source: (WHO 2012a).

<sup>a</sup> Countries are grouped by WHO region and income category, for details see (WHO 2012b) p. 174-175. High income countries are defined as countries with a Gross National Income (GNI) of more than US\$ 12,276.- per capita in 2010 according to the World Bank (The World Bank 2012) .

<sup>b</sup> Sub-Saharan

<sup>c</sup> Territories include Puerto Rico, Tokelau and Occupied Palestinian Territories.

## **Modeling approaches investigated**

Based on previous experience (Mehta et al. 2006; WHO 2010), various linear regression approaches were explored. A wide range of developmental and energy related covariates thought to be related to solid fuel use were investigated. These included income, percentage of rural population, percentage of population with access to improved sanitation, and percentage of total energy consumption from fossil fuels. These models were not retained as they often did not closely follow empirical data.

Alternative modelling approaches considered but not retained included the family of Bayesian hierarchical/Gaussian process regression models (Finucane et al. 2011; Forouzanfar et al. 2011; Hogan et al. 2010; Rajaratnam et al. 2010b, 2010a). These models consist of several steps and

are generally used with covariates. They were not retained because they are complex, prone to subjectivity in selecting parameters, and because the model output is strongly influenced by regional trends where survey data are scarce, which may not allow for a 'counter' trend in certain countries.

As the outcome variable of interest is a percentage, we also explored multilevel models using the logit transformation of the outcome variable (Baum 2008). However, the modelled results often diverged from the empirical trends in the mid-range, and the logit model did not allow deviation from a monotonically decreasing or increasing trend over time. Therefore, a normal space model restricted to values between 0 and 0.98, and with smoothing applied around those values, was preferred.

**Supplemental Material, Table S2. Percentage of population using solid fuels as main cooking fuel in 1990, 2000 and 2010, by country.**

| GBD<br>Region <sup>a</sup>                         | Country                        | SFU(%) (95% confidence interval, %) |              |              | Model <sup>c</sup> |
|----------------------------------------------------|--------------------------------|-------------------------------------|--------------|--------------|--------------------|
|                                                    |                                | 1990                                | 2000         | 2010         |                    |
| <i>Low and middle income countries<sup>b</sup></i> |                                |                                     |              |              |                    |
| <i>Africa<sup>b</sup></i>                          |                                |                                     |              |              |                    |
| NA/ME                                              | Algeria                        | 14 (1, 28)                          | 5 (0, 18)    | 0 (0, 11)    | 1                  |
| SSA Ce                                             | Angola                         | 98 (95, 100)                        | 84 (71, 97)  | 55 (42, 68)  | 1                  |
| SSA We                                             | Benin                          | 98 (87, 100)                        | 94 (81, 100) | 91 (78, 100) | 1                  |
| SSA So                                             | Botswana                       | 65 (52, 79)                         | 50 (37, 63)  | 37 (25, 51)  | 1                  |
| SSA We                                             | Burkina Faso                   | 98 (94, 100)                        | 98 (85, 100) | 92 (79, 100) | 1                  |
| SSA Ea                                             | Burundi                        | 98 (93, 100)                        | 98 (87, 100) | 96 (83, 100) | 1                  |
| SSA We                                             | Cameroon                       | 94 (81, 100)                        | 83 (70, 97)  | 75 (63, 89)  | 1                  |
| SSA We                                             | Cape Verde                     | 49 (36, 63)                         | 39 (26, 52)  | 32 (19, 45)  | 1                  |
| SSA Ce                                             | Central African Republic       | 98 (89, 100)                        | 98 (85, 100) | 96 (83, 100) | 1                  |
| SSA We                                             | Chad                           | 98 (93, 100)                        | 96 (83, 100) | 88 (75, 100) | 1                  |
| SSA Ea                                             | Comoros                        | 89 (76, 100)                        | 79 (66, 92)  | 71 (58, 84)  | 1                  |
| SSA Ce                                             | Congo                          | 97 (84, 100)                        | 86 (73, 99)  | 77 (64, 90)  | 1                  |
| SSA We                                             | Côte d'Ivoire                  | 87 (74, 100)                        | 81 (69, 95)  | 78 (65, 91)  | 1                  |
| SSA Ce                                             | DR of the Congo                | 98 (94, 100)                        | 98 (86, 100) | 93 (80, 100) | 1                  |
| SSA Ce                                             | Equatorial Guinea <sup>d</sup> | 82 (78, 85)                         | 79 (75, 82)  | 77 (74, 81)  | 2                  |
| SSA Ea                                             | Eritrea                        | 86 (73, 99)                         | 72 (59, 85)  | 60 (47, 73)  | 1                  |
| SSA Ea                                             | Ethiopia                       | 93 (80, 100)                        | 94 (81, 100) | 98 (85, 100) | 1                  |
| SSA Ce                                             | Gabon                          | 50 (37, 64)                         | 36 (24, 50)  | 26 (13, 39)  | 1                  |
| SSA We                                             | Gambia                         | 98 (90, 100)                        | 96 (83, 100) | 91 (78, 100) | 1                  |
| SSA We                                             | Ghana                          | 98 (88, 100)                        | 91 (78, 100) | 84 (71, 97)  | 1                  |
| SSA We                                             | Guinea                         | 98 (90, 100)                        | 98 (86, 100) | 97 (84, 100) | 1                  |
| SSA We                                             | Guinea-Bissau                  | 98 (86, 100)                        | 97 (84, 100) | 98 (85, 100) | 1                  |
| SSA Ea                                             | Kenya                          | 82 (69, 97)                         | 80 (67, 93)  | 80 (68, 93)  | 1                  |
| SSA So                                             | Lesotho                        | 63 (50, 77)                         | 61 (48, 74)  | 61 (48, 74)  | 1                  |
| SSA We                                             | Liberia                        | 98 (95, 100)                        | 98 (89, 100) | 98 (85, 100) | 1                  |
| SSA Ea                                             | Madagascar                     | 98 (89, 100)                        | 98 (86, 100) | 98 (86, 100) | 1                  |
| SSA Ea                                             | Malawi                         | 98 (89, 100)                        | 98 (85, 100) | 97 (84, 100) | 1                  |
| SSA We                                             | Mali                           | 95 (82, 100)                        | 96 (83, 100) | 98 (87, 100) | 1                  |
| SSA We                                             | Mauritania                     | 80 (67, 94)                         | 68 (55, 81)  | 58 (45, 71)  | 1                  |
| As SE                                              | Mauritius                      | 19 (6, 33)                          | 7 (0, 20)    | 0 (0, 11)    | 1                  |
| SSA Ea                                             | Mozambique                     | 98 (90, 100)                        | 98 (85, 100) | 95 (82, 100) | 1                  |
| SSA So                                             | Namibia                        | 74 (61, 89)                         | 63 (50, 77)  | 55 (42, 68)  | 1                  |
| SSA We                                             | Niger                          | 98 (89, 100)                        | 98 (85, 100) | 96 (83, 100) | 1                  |
| SSA We                                             | Nigeria                        | 74 (60, 88)                         | 72 (60, 86)  | 74 (61, 87)  | 1                  |
| SSA Ea                                             | Rwanda                         | 98 (88, 100)                        | 98 (86, 100) | 98 (86, 100) | 1                  |
| SSA We                                             | Sao Tome and Principe          | 91 (78, 100)                        | 80 (67, 93)  | 71 (58, 84)  | 1                  |
| SSA We                                             | Senegal                        | 81 (68, 95)                         | 65 (52, 78)  | 51 (38, 64)  | 1                  |
| As SE                                              | Seychelles                     | 20 (7, 34)                          | 7 (0, 20)    | 0 (0, 0, 10) | 1                  |
| SSA We                                             | Sierra Leone                   | 93 (80, 100)                        | 95 (82, 100) | 98 (86, 100) | 1                  |
| SSA So                                             | South Africa                   | 39 (26, 53)                         | 25 (13, 39)  | 15 (2, 28)   | 1                  |
| SSA So                                             | Swaziland                      | 78 (65, 92)                         | 65 (52, 79)  | 55 (43, 69)  | 1                  |
| SSA We                                             | Togo                           | 98 (94, 100)                        | 98 (87, 100) | 94 (81, 100) | 1                  |
| SSA Ea                                             | Uganda                         | 98 (88, 100)                        | 97 (84, 100) | 96 (84, 100) | 1                  |
| SSA Ea                                             | Tanzania, United Republic      | 98 (86, 100)                        | 96 (83, 100) | 94 (81, 100) | 1                  |
| SSA Ea                                             | Zambia                         | 95 (81, 100)                        | 87 (74, 100) | 83 (70, 96)  | 1                  |

| GBD<br>Region <sup>a</sup>               | Country                         | SFU(%) (95% confidence interval, %) |              |              | Model <sup>c</sup> |
|------------------------------------------|---------------------------------|-------------------------------------|--------------|--------------|--------------------|
|                                          |                                 | 1990                                | 2000         | 2010         |                    |
| SSA So                                   | Zimbabwe                        | 68 (55, 82)                         | 66 (53, 79)  | 66 (53, 79)  | 1                  |
| <i>Americas<sup>b</sup></i>              |                                 |                                     |              |              |                    |
| LA So                                    | Argentina                       | 17 (4, 31)                          | 6 (0, 20)    | 0 (0, 12)    | 1                  |
| Carib                                    | Belize                          | 29 (16, 44)                         | 19 (7, 33)   | 12 (0, 25)   | 1                  |
| LA And                                   | Bolivia, Plurinational States   | 45 (32, 59)                         | 36 (23, 49)  | 29 (16, 42)  | 1                  |
| LA Tro                                   | Brazil                          | 19 (6, 33)                          | 11 (0, 24)   | 6 (0, 19)    | 1                  |
| LA So                                    | Chile                           | 24 (10, 38)                         | 14 (1, 27)   | 6 (0, 19)    | 1                  |
| LA Ce                                    | Colombia                        | 26 (13, 40)                         | 19 (6, 32)   | 14 (1, 27)   | 1                  |
| LA Ce                                    | Costa Rica                      | 23 (10, 37)                         | 13 (0, 26)   | 6 (0, 19)    | 1                  |
| Carib                                    | Cuba                            | 7 (0, 21)                           | 6 (0, 20)    | 9 (0, 22)    | 1                  |
| Carib                                    | Dominica                        | 42 (29, 56)                         | 20 (7, 33)   | 1 (0, 14)    | 1                  |
| Carib                                    | Dominican Republic              | 37 (23, 51)                         | 20 (7, 34)   | 7 (0, 20)    | 1                  |
| LA And                                   | Ecuador                         | 27 (14, 41)                         | 13 (1, 26)   | 2 (0, 15)    | 1                  |
| LA Ce                                    | El Salvador                     | 50 (37, 64)                         | 35 (22, 48)  | 22 (9, 35)   | 1                  |
| Carib                                    | Grenada                         | 31 (17, 45)                         | 11 (0, 25)   | 0 (0, 0)     | 1                  |
| LA Ce                                    | Guatemala                       | 64 (51, 78)                         | 59 (46, 72)  | 57 (44, 70)  | 1                  |
| Carib                                    | Guyana                          | 26 (12, 40)                         | 15 (2, 28)   | 7 (0, 20)    | 1                  |
| Carib                                    | Haiti                           | 98 (87, 100)                        | 94 (81, 100) | 91 (78, 100) | 1                  |
| LA Ce                                    | Honduras                        | 68 (55, 82)                         | 58 (45, 71)  | 51 (38, 64)  | 1                  |
| Carib                                    | Jamaica                         | 38 (25, 52)                         | 23 (10, 36)  | 11 (0, 24)   | 1                  |
| LA Ce                                    | Mexico                          | 25 (12, 39)                         | 18 (5, 31)   | 14 (1, 27)   | 1                  |
| LA Ce                                    | Nicaragua                       | 77 (63, 91)                         | 64 (51, 77)  | 54 (41, 67)  | 1                  |
| LA Ce                                    | Panama                          | 25 (11, 39)                         | 20 (7, 33)   | 18 (5, 31)   | 1                  |
| LA Tro                                   | Paraguay                        | 54 (41, 69)                         | 50 (38, 54)  | 49 (36, 62)  | 1                  |
| LA And                                   | Peru                            | 62 (49, 76)                         | 48 (35, 61)  | 36 (24, 50)  | 1                  |
| Carib                                    | Saint Kitts and Nevis           | 27 (22, 33)                         | 19 (13, 24)  | 14 (8, 19)   | 2                  |
| Carib                                    | Saint Lucia                     | 37 (24, 51)                         | 14 (2, 28)   | 0 (0, 8)     | 1                  |
| Carib                                    | Saint Vincent and<br>Grenadines | 69 (56, 83)                         | 35 (22, 48)  | 3 (0, 16)    | 1                  |
| Carib                                    | Suriname                        | 30 (16, 44)                         | 19 (6, 33)   | 12 (0, 25)   | 1                  |
| LA So                                    | Uruguay                         | 11 (0, 25)                          | 4 (0, 17)    | 0 (0, 13)    | 1                  |
| LA Ce                                    | Venezuela, Boliv. Rep.          | 15 (2, 29)                          | 3 (0, 17)    | 0 (0, 8)     | 1                  |
| <i>Eastern Mediterranean<sup>b</sup></i> |                                 |                                     |              |              |                    |
| NA/ME                                    | Afghanistan                     | 98 (87, 100)                        | 91 (79, 100) | 85 (72, 98)  | 1                  |
| SSA Ea                                   | Djibouti                        | 16 (2, 30)                          | 13 (0, 26)   | 13 (0, 27)   | 1                  |
| NA/ME                                    | Egypt                           | 7 (0, 21)                           | 1 (0, 15)    | 0 (0, 11)    | 1                  |
| NA/ME                                    | Iran (Islamic Republic of)      | 12 (0, 26)                          | 3 (0, 17)    | 0 (0, 11)    | 1                  |
| NA/ME                                    | Iraq                            | 11 (0, 26)                          | 4 (0, 18)    | 0 (0, 13)    | 1                  |
| NA/ME                                    | Jordan                          | 12 (0, 26)                          | 3 (0, 17)    | 0 (0, 11)    | 1                  |
| NA/ME                                    | Lebanon                         | 8 (0, 22)                           | 0 (0, 12)    | 0 (0, 5)     | 1                  |
| NA/ME                                    | Libyan Arab Jamahiriya          | 11 (0, 25)                          | 1 (0, 14)    | 0 (0, 8)     | 1                  |
| NA/ME                                    | Morocco                         | 19 (6, 33)                          | 9 (0, 23)    | 2 (0, 15)    | 1                  |
| As So                                    | Pakistan                        | 88 (74, 100)                        | 74 (61, 88)  | 64 (51, 77)  | 1                  |
| SSA Ea                                   | Somalia                         | 98 (94, 100)                        | 98 (87, 100) | 95 (82, 100) | 1                  |
| SSA Ea                                   | Sudan                           | 98 (94, 100)                        | 93 (80, 100) | 79 (66, 92)  | 1                  |
| NA/ME                                    | Syrian Arab Republic            | 16 (3, 30)                          | 5 (0, 18)    | 0 (0, 10)    | 1                  |
| NA/ME                                    | Tunisia                         | 18 (5, 32)                          | 6 (0, 20)    | 0 (0, 11)    | 1                  |
| NA/ME                                    | Yemen                           | 48 (35, 62)                         | 39 (26, 53)  | 33 (20, 46)  | 1                  |
| <i>Europe<sup>b</sup></i>                |                                 |                                     |              |              |                    |
| Eur Ce                                   | Albania                         | 64 (51, 78)                         | 50 (37, 63)  | 39 (26, 52)  | 1                  |

| GBD<br>Region <sup>a</sup>         | Country                  | SFU(%) (95% confidence interval, %) |              |              | Model <sup>c</sup> |
|------------------------------------|--------------------------|-------------------------------------|--------------|--------------|--------------------|
|                                    |                          | 1990                                | 2000         | 2010         |                    |
| As Ce                              | Armenia                  | 85 (71, 97)                         | 50 (37, 64)  | 19 (6, 32)   | 1                  |
| As Ce                              | Azerbaijan               | 52 (38, 66)                         | 28 (15, 41)  | 7 (0, 20)    | 1                  |
| Eur Ea                             | Belarus                  | 19 (6, 33)                          | 8 (0, 21)    | 0 (0, 13)    | 1                  |
| Eur Ce                             | Bosnia and Herzegovina   | 58 (45, 72)                         | 50 (37, 64)  | 45 (32, 58)  | 1                  |
| Eur Ce                             | Bulgaria                 | 23 (17, 28)                         | 13 (8, 19)   | 7 (2, 12)    | 2                  |
| As Ce                              | Georgia                  | 55 (42, 69)                         | 49 (36, 62)  | 46 (33, 59)  | 1                  |
| As Ce                              | Kazakhstan               | 29 (15, 43)                         | 17 (4, 31)   | 9 (0, 22)    | 1                  |
| As Ce                              | Kyrgyzstan               | 51 (37, 65)                         | 41 (28, 54)  | 34 (21, 47)  | 1                  |
| Eur Ea                             | Latvia                   | 23 (10, 37)                         | 13 (0, 26)   | 5 (0, 18)    | 1                  |
| Eur Ea                             | Lithuania                | 23 (17, 28)                         | 13 (8, 19)   | 7 (2, 12)    | 2                  |
| Eur Ce                             | Montenegro               | 44 (31, 58)                         | 35 (22, 48)  | 28 (15, 41)  | 1                  |
| Eur Ea                             | Republic of Moldova      | 28 (14, 42)                         | 18 (5, 31)   | 11 (0, 24)   | 1                  |
| Eur Ce                             | Romania                  | 35 (22, 49)                         | 25 (12, 38)  | 17 (4, 30)   | 1                  |
| Eur Ea                             | Russian Federation       | 9 (0, 23)                           | 3 (0, 17)    | 0 (0, 13)    | 1                  |
| Eur Ce                             | Serbia                   | 51 (38, 65)                         | 40 (27, 54)  | 32 (19, 45)  | 1                  |
| As Ce                              | Tajikistan               | 86 (73, 98)                         | 59 (46, 72)  | 34 (22, 48)  | 1                  |
| Eur Ce                             | TFYR of Macedonia        | 48 (34, 62)                         | 39 (26, 52)  | 33 (20, 46)  | 1                  |
| NA/ME                              | Turkey                   | 21 (7, 35)                          | 10 (0, 24)   | 3 (0, 16)    | 1                  |
| As Ce                              | Turkmenistan             | 14 (1, 28)                          | 3 (0, 16)    | 0 (0, 8)     | 1                  |
| Eur Ea                             | Ukraine                  | 21 (8, 35)                          | 10 (0, 24)   | 3 (0, 16)    | 1                  |
| As Ce                              | Uzbekistan               | 31 (18, 45)                         | 20 (7, 33)   | 11 (0, 24)   | 1                  |
| <i>South East Asia<sup>b</sup></i> |                          |                                     |              |              |                    |
| As So                              | Bangladesh               | 91 (78, 100)                        | 89 (76, 100) | 91 (78, 100) | 1                  |
| As So                              | Bhutan                   | 78 (65, 93)                         | 58 (45, 71)  | 40 (27, 53)  | 1                  |
| As Ea                              | DPR of Korea             | 98 (85, 100)                        | 93 (80, 100) | 91 (78, 100) | 1                  |
| As So                              | India                    | 87 (73, 99)                         | 71 (58, 84)  | 58 (45, 71)  | 1                  |
| As SE                              | Indonesia                | 67 (53, 81)                         | 59 (46, 73)  | 55 (42, 68)  | 1                  |
| As SE                              | Maldives                 | 64 (15, 78)                         | 35 (22, 48)  | 8 (0, 22)    | 1                  |
| As SE                              | Myanmar                  | 98 (89, 100)                        | 95 (83, 100) | 92 (79, 100) | 1                  |
| As So                              | Nepal                    | 74 (61, 88)                         | 77 (64, 90)  | 82 (69, 95)  | 1                  |
| As SE                              | Sri Lanka                | 89 (76, 100)                        | 80 (68, 94)  | 75 (62, 88)  | 1                  |
| As SE                              | Thailand                 | 63 (50, 77)                         | 43 (30, 57)  | 26 (13, 39)  | 1                  |
| As SE                              | Timor-Leste              | 96 (82, 100)                        | 92 (79, 100) | 92 (79, 100) | 1                  |
| <i>Western Pacific<sup>b</sup></i> |                          |                                     |              |              |                    |
| As SE                              | Cambodia                 | 98 (88, 100)                        | 94 (81, 100) | 89 (76, 100) | 1                  |
| As Ea                              | China                    | 64 (51, 78)                         | 53 (41, 67)  | 46 (33, 59)  | 1                  |
| Ocea                               | Cook Islands             | 23 (9, 37)                          | 12 (0, 25)   | 4 (0, 17)    | 1                  |
| Ocea                               | Fiji                     | 55 (42, 69)                         | 44 (32, 58)  | 37 (24, 50)  | 1                  |
| Ocea                               | Kiribati                 | 66 (54, 77)                         | 55 (43, 66)  | 46 (35, 57)  | 2                  |
| As SE                              | Lao PDR                  | 96 (83, 100)                        | 95 (82, 100) | 96 (83, 100) | 1                  |
| As SE                              | Malaysia                 | 22 (9, 36)                          | 8 (0, 21)    | 0 (0, 10)    | 1                  |
| Ocea                               | Marshall Islands         | 20 (6, 34)                          | 24 (11, 38)  | 32 (19, 45)  | 1                  |
| Ocea                               | Micronesia (Fed. St. of) | 55 (42, 70)                         | 47 (34, 60)  | 41 (28, 54)  | 1                  |
| As Ce                              | Mongolia                 | 81 (68, 95)                         | 75 (62, 89)  | 72 (60, 86)  | 1                  |
| Ocea                               | Nauru                    | 5 (0, 19)                           | 3 (0, 17)    | 5 (0, 18)    | 1                  |
| <i>Western Pacific<sup>b</sup></i> |                          |                                     |              |              |                    |
| Ocea                               | Niue                     | 46 (32, 60)                         | 23 (10, 37)  | 4 (0, 17)    | 1                  |
| Ocea                               | Palau                    | 10 (0, 24)                          | 1 (0, 15)    | 0 (0, 8)     | 1                  |
| Ocea                               | Papua New Guinea         | 95 (82, 100)                        | 83 (70, 96)  | 73 (60, 86)  | 1                  |
| As SE                              | Philippines              | 60 (47, 74)                         | 53 (41, 67)  | 50 (37, 63)  | 1                  |

| GBD<br>Region <sup>a</sup>               | Country              | SFU(%) (95% confidence interval, %) |              |              | Model <sup>c</sup> |
|------------------------------------------|----------------------|-------------------------------------|--------------|--------------|--------------------|
|                                          |                      | 1990                                | 2000         | 2010         |                    |
| Ocea                                     | Samoa                | 70 (57, 84)                         | 60 (47, 74)  | 53 (40, 66)  | 1                  |
| Ocea                                     | Solomon Islands      | 90 (77, 100)                        | 88 (76, 100) | 90 (77, 100) | 1                  |
| Ocea                                     | Tonga                | 72 (58, 86)                         | 56 (43, 69)  | 43 (30, 56)  | 1                  |
| Ocea                                     | Tuvalu               | 67 (54, 81)                         | 42 (29, 55)  | 19 (6, 32)   | 1                  |
| Ocea                                     | Vanuatu              | 83 (69, 97)                         | 82 (69, 95)  | 84 (71, 97)  | 1                  |
| As SE                                    | Viet Nam             | 97 (85, 100)                        | 76 (63, 89)  | 56 (43, 69)  | 1                  |
| <b>High income countries<sup>b</sup></b> |                      |                                     |              |              |                    |
| Eur We                                   | Andorra              | <5                                  | <5           | <5           | 3                  |
| Carib                                    | Antigua and Barbuda  | 14 (1, 28)                          | 5 (0, 18)    | 0 (0, 12)    | 1                  |
| AusAs                                    | Australia            | <5                                  | <5           | <5           | 3                  |
| Eur We                                   | Austria              | <5                                  | <5           | <5           | 3                  |
| Carib                                    | Bahamas              | <5                                  | <5           | <5           | 3                  |
| NA/ME                                    | Bahrain              | <5                                  | <5           | <5           | 3                  |
| Carib                                    | Barbados             | 3 (0, 17)                           | 0 (0, 13)    | 0 (0, 11)    | 1                  |
| Eur We                                   | Belgium              | <5                                  | <5           | <5           | 3                  |
| AP HI                                    | Brunei Darussalam    | <5                                  | <5           | <5           | 3                  |
| NA HI                                    | Canada               | <5                                  | <5           | <5           | 3                  |
| Eur Ce                                   | Croatia              | 27 (14, 41)                         | 16 (3, 29)   | 8 (0, 21)    | 1                  |
| Eur We                                   | Cyprus               | <5                                  | <5           | <5           | 3                  |
| Eur Ce                                   | Czech Republic       | 18 (5, 32)                          | 6 (0, 20)    | 0 (0, 10)    | 1                  |
| Eur We                                   | Denmark              | <5                                  | <5           | <5           | 3                  |
| Eur Ea                                   | Estonia              | 28 (15, 42)                         | 18 (5, 32)   | 11 (0, 24)   | 1                  |
| Eur We                                   | Finland              | <5                                  | <5           | <5           | 3                  |
| Eur We                                   | France               | <5                                  | <5           | <5           | 3                  |
| Eur We                                   | Germany              | <5                                  | <5           | <5           | 3                  |
| Eur We                                   | Greece               | <5                                  | <5           | <5           | 3                  |
| Eur Ce                                   | Hungary <sup>c</sup> | 2 (1, 2)                            | 0 (0, 1)     | <5           | 2, 3               |
| Eur We                                   | Iceland              | <5                                  | <5           | <5           | 3                  |
| Eur We                                   | Ireland              | <5                                  | <5           | <5           | 3                  |
| Eur We                                   | Israel               | <5                                  | <5           | <5           | 3                  |
| Eur We                                   | Italy                | <5                                  | <5           | <5           | 3                  |
| AP HI                                    | Japan                | <5                                  | <5           | <5           | 3                  |
| NA/ME                                    | Kuwait               | <5                                  | <5           | <5           | 3                  |
| Eur We                                   | Luxembourg           | <5                                  | <5           | <5           | 3                  |
| Eur We                                   | Malta                | <5                                  | <5           | <5           | 3                  |
| Eur We                                   | Monaco               | <5                                  | <5           | <5           | 3                  |
| Eur We                                   | Netherlands          | <5                                  | <5           | <5           | 3                  |
| AusAs                                    | New Zealand          | <5                                  | <5           | <5           | 3                  |
| Eur We                                   | Norway               | <5                                  | <5           | <5           | 3                  |
| NA/ME                                    | Oman                 | <5                                  | <5           | <5           | 3                  |
| Eur Ce                                   | Poland <sup>c</sup>  | 2 (1, 2)                            | 0 (0, 1)     | <5           | 2, 3               |
| Eur We                                   | Portugal             | <5                                  | <5           | <5           | 3                  |
| NA/ME                                    | Qatar                | 8 (0, 22)                           | 2 (0, 15)    | 0 (0, 12)    | 1                  |
| <b>High income countries<sup>b</sup></b> |                      |                                     |              |              |                    |
| AP HI                                    | Republic of Korea    | 20 (7, 24)                          | 0 (0, 5)     | 0 (0, 5)     | 1                  |
| Eur We                                   | San Marino           | <5                                  | <5           | <5           | 3                  |
| NA/ME                                    | Saudi Arabia         | <5                                  | <5           | <5           | 3                  |
| AP HI                                    | Singapore            | <5                                  | <5           | <5           | 3                  |
| Eur Ce                                   | Slovakia             | 19 (6, 33)                          | 7 (0, 21)    | 0 (0, 11)    | 1                  |
| Eur Ce                                   | Slovenia             | 24 (10, 38)                         | 12 (0, 26)   | 4 (0, 17)    | 1                  |

| GBD<br>Region <sup>a</sup> | Country                               | SFU(%) (95% confidence interval, %) |           |           | Model <sup>c</sup> |
|----------------------------|---------------------------------------|-------------------------------------|-----------|-----------|--------------------|
|                            |                                       | 1990                                | 2000      | 2010      |                    |
| Eur We                     | Spain <sup>f</sup>                    | <5                                  | <5        | <5        | 3                  |
| Eur We                     | Sweden                                | <5                                  | <5        | <5        | 3                  |
| Eur We                     | Switzerland                           | <5                                  | <5        | <5        | 3                  |
| Carib                      | Trinidad and Tobago                   | 19 (6, 33)                          | 7 (0, 20) | 0 (0, 11) | 1                  |
| NA/ME                      | United Arab Emirates                  | 14 (1, 28)                          | 3 (0, 17) | 0 (0, 8)  | 1                  |
| Eur We                     | United Kingdom                        | <5                                  | <5        | <5        | 3                  |
| NA HI                      | United States of America <sup>f</sup> | <5                                  | <5        | <5        | 3                  |

SFU: solid fuel use. DPR: Democratic People's Republic. DR: Democratic Republic. PDR: People's Democratic Republic. Boliv. Rep.: Bolivarian Republic. TFYR: The former Yugoslav Republic. Fed. St.: Federated States. AP HI: Asia Pacific, High Income; As Ce: Asia Central; As So: Asia Southern; Asia SE: Asia Southeast; AusAs: Australasia; Carib: Caribbean; ; Eur Ce: Europe Central; Eur Ea: Europe East; Eur We; Europe West; LA And: Latin America, Andean; LA Cen: Latin America Central; LA So: Latin America, Southern; LA Trop: Latin America, Tropical; NA HI: North America High Income; NA/ME: North Africa/ Middle East; Ocea: Oceania; SSA CE: Sub-Saharan Africa, Central; SSA Ea: Sub-Saharan Africa, East; SSA So: Sub-Saharan Africa, Southern; SSA We: Sub-Saharan Africa, West.

<sup>a</sup> 21 Global Burden of Disease regions (Institute for Health Metrics and Evaluation et al. 2009).

<sup>b</sup> WHO regions and income category [see (WHO 2012b) p. 174-175]. Africa refers to Sub-Saharan Africa.

<sup>c</sup> Type of model used: 1 multilevel model; 2 regional estimates: these estimates provide indicative values only and are not based on the data of the specific country; 3 Countries with no survey data classified as high income countries, for which assumption was made that solid fuel use for cooking is <5%. Note that this does not strictly mean that no solid fuels are used, but if they are, they are used in stoves or devices that do not result in exposure.

<sup>d</sup> Equatorial Guinea is included in Africa and not grouped with high income countries for the purpose of this analysis.

<sup>e</sup> Hungary and Poland qualify as high-income countries in 2010 according to the World Bank (The World Bank 2012).

<sup>f</sup> Survey data for Spain and United States of America was available and was included in the model, yet these two countries are reported as high-income with no data and SFU <5% (consistent with model output).



**Supplemental Material, Table S3. Percentage of population using solid fuels as main cooking fuel in 1990, 2000 and 2010, by region.**

| Region <sup>a</sup>                    | SFU (%) (95% confidence interval, %) |                     |                     |
|----------------------------------------|--------------------------------------|---------------------|---------------------|
|                                        | 1990                                 | 2000                | 2010                |
| <i>Low and middle income countries</i> |                                      |                     |                     |
| Africa <sup>b</sup>                    | 82 (78,85)                           | 79 (75, 82)         | 77 (74, 81)         |
| Americas                               | 27 (22, 33)                          | 19 (13, 24)         | 14 (8, 19)          |
| Eastern Mediterranean                  | 48 (43,54)                           | 40 (35, 46)         | 35 (29, 40)         |
| Europe                                 | 23 (17, 28)                          | 13 (8, 19)          | 7 (2, 12)           |
| South East Asia                        | 83 (74, 93)                          | 71 (62, 80)         | 61 (52, 70)         |
| Western Pacific                        | 66 (54, 77)                          | 55 (43, 66)         | 46 (35, 57)         |
| <i>High income countries</i>           | 2 (1, 2)                             | 0 (0, 1)            | 0 (0, 1)            |
| <b>World</b>                           | <b>53 (49 , 56)</b>                  | <b>46 (42 , 49)</b> | <b>41 (37 , 44)</b> |

SFU: solid fuel use.

<sup>a</sup> Countries are grouped by WHO region and income category [see (WHO 2012b) p. 174-175].

<sup>b</sup> Sub-Saharan Africa

**Supplemental Material, Table S4. Population using solid fuels as main cooking fuel in 1990, 2000 and 2010, by region.**

| Region <sup>a</sup>                    | Population exposed [millions] (95% confidence intervals) |                          |                          |
|----------------------------------------|----------------------------------------------------------|--------------------------|--------------------------|
|                                        | 1990                                                     | 2000                     | 2010                     |
| <i>Low and middle income countries</i> |                                                          |                          |                          |
| Africa <sup>b</sup>                    | 413 (395, 431)                                           | 517 (494, 539)           | 646 (617, 675)           |
| Americas                               | 119 (95, 143)                                            | 97 (69, 124)             | 80 (49, 111)             |
| Eastern Mediterranean                  | 171 (152, 190)                                           | 182 (159, 206)           | 190 (162, 219)           |
| Europe                                 | 89 (66, 112)                                             | 53 (31, 75)              | 28 (7, 50)               |
| South East Asia                        | 1100 (979, 1221)                                         | 1112 (972, 1253)         | 1097 (934, 1260)         |
| Western Pacific                        | 865 (711, 1020)                                          | 809 (643, 975)           | 739 (563, 914)           |
| <i>High income countries</i>           | 15 (10, 21)                                              | 3 (0, 9)                 | 1 (0, 7)                 |
| <b>World</b>                           | <b>2772 (2571, 2973)</b>                                 | <b>2773 (2551, 2996)</b> | <b>2780 (2534, 3027)</b> |

<sup>a</sup> Countries are grouped by WHO region and income category [see (WHO 2012b) p. 174-175].

<sup>b</sup> Sub-Saharan Africa

## References

- Baum C. 2008. Stata tip 63: Modeling proportions. *The Stata Journal* 8:299–303.
- Finucane MM, Stevens GA, Cowan MJ, Danaei G, Lin JK, Paciorek CJ, et al. 2011. National, regional, and global trends in body-mass index since 1980: systematic analysis of health examination surveys and epidemiological studies with 960 country-years and 9·1 million participants. *Lancet* 377:557–567; doi:10.1016/S0140-6736(10)62037-5.
- Forouzanfar MH, Foreman KJ, Delossantos AM, Lozano R, Lopez AD, Murray CJL, et al. 2011. Breast and cervical cancer in 187 countries between 1980 and 2010: a systematic analysis. *Lancet* 378:1461–1484; doi:10.1016/S0140-6736(11)61351-2.
- Hogan MC, Foreman KJ, Naghavi M, Ahn SY, Wang M, Makela SM, et al. 2010. Maternal mortality for 181 countries, 1980–2008: a systematic analysis of progress towards Millennium Development Goal 5. *Lancet* 375:1609–1623; doi:10.1016/S0140-6736(10)60518-1.
- Institute for Health Metrics and Evaluation, Harvard University, Johns Hopkins University, University of Queensland, WHO. 2009. Operations Manual - Final Draft. Available : [http://www.gbd.unsw.edu.au/gbdweb.nsf/resources/OperationsManual/\\$file/final+GBD+operations+manual.pdf](http://www.gbd.unsw.edu.au/gbdweb.nsf/resources/OperationsManual/$file/final+GBD+operations+manual.pdf) [accessed 23 March 2012]
- Mehta S, Gore F, Prüss-Üstün A, Rehfuess E, Smith K. 2006. Modeling household solid fuel use towards reporting of the Millennium Development Goal indicator. *Energy for Sustainable Development* 10:36–45; doi:10.1016/S0973-0826(08)60542-6.
- Rajaratnam JK, Marcus JR, Flaxman AD, Wang H, Levin-Rector A, Dwyer L, et al. 2010a. Neonatal, postneonatal, childhood, and under-5 mortality for 187 countries, 1970–2010: a systematic analysis of progress towards Millennium Development Goal 4. *The Lancet* 375:1988–2008; doi:10.1016/S0140-6736(10)60703-9.
- Rajaratnam JK, Marcus JR, Levin-Rector A, Chalupka AN, Wang H, Dwyer L, et al. 2010b. Worldwide mortality in men and women aged 15–59 years from 1970 to 2010: a systematic analysis. *Lancet* 375:1704–1720; doi:10.1016/S0140-6736(10)60517-X.
- The World Bank. 2012. Data - How we classify countries. Available: <http://data.worldbank.org/about/country-classifications> [accessed 23 March 2012].

WHO (World Health Organization). 2010. World health statistics 2010. Available:  
[http://www.who.int/gho/publications/world\\_health\\_statistics/2010/en/index.html](http://www.who.int/gho/publications/world_health_statistics/2010/en/index.html) [accessed  
14 March 2013].

WHO (World Health Organization). 2012a. Global Health Observatory. WHO. Available:  
<http://www.who.int/gho/en/> [accessed 23 March 2012].

WHO (World Health Organization). 2012b. World health statistics 2012. Available:  
[http://www.who.int/gho/publications/world\\_health\\_statistics/2012/en/index.html](http://www.who.int/gho/publications/world_health_statistics/2012/en/index.html) [accessed  
14 March 2013].
